# Supplementary material for: What Do Lithuanian Hunters Think of African Swine Fever and Its Control—Perceptions
Source: PubMed Central journal article supplement (PMC7922269; doi:10.3390/ani11020525), 2021-02-18
Supplement: animals-11-00525-s001.pdf [file animals-11-00525-s001.pdf]

Questionnaire-No:  
(will be filled by the researchers)

## **Control of African swine fever (ASF) in wild boar**

Hunters and their willingness to support ASF control measures are crucial for effectively combating the disease in wild boar. An active participation of hunters requires their understanding and their acceptance of the implemented control measures.

In the following questionnaire, we would like to identify impediments, concerns and opinions regarding the support of ASF control measures. Thus, we would like to ask you as hunters for your thoughts and opinions to increase the motivation needed for ASF control in wild boar.

By filling in this questionnaire you agree that the obtained data is used anonymously for research and publication.

Thank you very much for your participation!

### **Part I. General information**

**Date:**

**Gender:**

Female       Male       Diverse

**Age-group (years):**

18-40       41-60       > 60

**County:**

Alytus       Kauno       Klaipėdos  
 Marijampolės       Panevėžio       Šiaulių  
 Tauragės       Telšiai       Utenos  
 Vilniaus

**Hunting frequency (per month):**

less than once       1-5 times       6-10 times       more than 10 times

**Hunting experience (years):**

< 5       5-10       > 10

### **Part II. Knowledge about ASF**

**Question 1:**

Please tick the response that best describes the extent to which you agree or disagree with the following statement: My knowledge about ASF is good.

Strongly agree       To a high extent       Neither agree nor disagree       To a low extent       Strongly Disagree

**Question 2:**

What are your sources of information about ASF (multiple answers possible)?

- |                                                            |                                             |
|------------------------------------------------------------|---------------------------------------------|
| <input type="checkbox"/> State Food and Veterinary Service | <input type="checkbox"/> Hunting magazine   |
| <input type="checkbox"/> Private veterinarians             | <input type="checkbox"/> Newspaper and TV   |
| <input type="checkbox"/> Official hunting meetings         | <input type="checkbox"/> Hunting colleagues |
| <input type="checkbox"/> Other, please specify:            |                                             |
- 

**Part III. Control of ASF (vaccination is currently not available, thus is it not listed as a control option)**

**Question 3:**

In what kind of actions to control ASF did you take part (multiple answers possible)?

- |                                                                                                                                                                |                                                                |
|----------------------------------------------------------------------------------------------------------------------------------------------------------------|----------------------------------------------------------------|
| <input type="checkbox"/> Intensified hunting                                                                                                                   | <input type="checkbox"/> Sampling of wild boar                 |
| <input type="checkbox"/> Compulsory active carcass search                                                                                                      | <input type="checkbox"/> Voluntary active carcass search       |
| <input type="checkbox"/> Disposal of carcass                                                                                                                   | <input type="checkbox"/> Selective hunting on female wild boar |
| <input type="checkbox"/> Performing increased biosecurity measures<br>incl. disinfection, installation of disinfection<br>barriers, fencing of dressing places | <input type="checkbox"/> None (then continue with question 5)  |
| <input type="checkbox"/> Other, please specify:                                                                                                                |                                                                |
- 

**Question 4:**

When did you take part in one of the activities listed in question 3?

- |                                  |                                  |
|----------------------------------|----------------------------------|
| <input type="checkbox"/> 2014/15 | <input type="checkbox"/> 2017/18 |
| <input type="checkbox"/> 2015/16 | <input type="checkbox"/> 2018/19 |
| <input type="checkbox"/> 2016/17 | <input type="checkbox"/> 2019/20 |

**Question 5:**

Do you believe, control and elimination of ASF in Lithuania can be achieved?

- |                              |                             |
|------------------------------|-----------------------------|
| <input type="checkbox"/> Yes | <input type="checkbox"/> No |
|------------------------------|-----------------------------|

**Question 6:**

Could you imagine that ASF disappears without any human intervention from the Lithuanian wild boar population?

- |                              |                             |
|------------------------------|-----------------------------|
| <input type="checkbox"/> Yes | <input type="checkbox"/> No |
|------------------------------|-----------------------------|

**Question 7:**

To which extent do you consider the listed control measures as effective in eliminating ASF from the wild boar population (independently of their feasibility)?

|                                                                                      | Very effective           | To a high extent         | Neither effective nor ineffective | To a low extent          | Not effective at all     |
|--------------------------------------------------------------------------------------|--------------------------|--------------------------|-----------------------------------|--------------------------|--------------------------|
| Reduction of population density through intensified hunting                          | <input type="checkbox"/> | <input type="checkbox"/> | <input type="checkbox"/>          | <input type="checkbox"/> | <input type="checkbox"/> |
| Search for carcasses and removal                                                     | <input type="checkbox"/> | <input type="checkbox"/> | <input type="checkbox"/>          | <input type="checkbox"/> | <input type="checkbox"/> |
| Selective hunting on females                                                         | <input type="checkbox"/> | <input type="checkbox"/> | <input type="checkbox"/>          | <input type="checkbox"/> | <input type="checkbox"/> |
| Ban of individual hunting                                                            | <input type="checkbox"/> | <input type="checkbox"/> | <input type="checkbox"/>          | <input type="checkbox"/> | <input type="checkbox"/> |
| Ban of driven hunting                                                                | <input type="checkbox"/> | <input type="checkbox"/> | <input type="checkbox"/>          | <input type="checkbox"/> | <input type="checkbox"/> |
| Including additional forces like army/police/hired hunters in active carcass finding | <input type="checkbox"/> | <input type="checkbox"/> | <input type="checkbox"/>          | <input type="checkbox"/> | <input type="checkbox"/> |
| Other additional forces:                                                             |                          |                          |                                   |                          |                          |
| Including additional forces as described above in wild boar shooting                 | <input type="checkbox"/> | <input type="checkbox"/> | <input type="checkbox"/>          | <input type="checkbox"/> | <input type="checkbox"/> |
| Other additional forces:                                                             |                          |                          |                                   |                          |                          |
| Increased biosecurity measures                                                       | <input type="checkbox"/> | <input type="checkbox"/> | <input type="checkbox"/>          | <input type="checkbox"/> | <input type="checkbox"/> |
| Ban of supplementary feeding                                                         | <input type="checkbox"/> | <input type="checkbox"/> | <input type="checkbox"/>          | <input type="checkbox"/> | <input type="checkbox"/> |
| Provision of supporting hunting tools like night vision or silencer                  | <input type="checkbox"/> | <input type="checkbox"/> | <input type="checkbox"/>          | <input type="checkbox"/> | <input type="checkbox"/> |
| Other, please specify: _____                                                         | <input type="checkbox"/> | <input type="checkbox"/> | <input type="checkbox"/>          | <input type="checkbox"/> | <input type="checkbox"/> |
| Other, please specify: _____                                                         | <input type="checkbox"/> | <input type="checkbox"/> | <input type="checkbox"/>          | <input type="checkbox"/> | <input type="checkbox"/> |

**Question 8:**

Which options do you consider as **not** feasible in the field and why (multiple answers possible)?

- Including additional forces like army or police; why: \_\_\_\_\_
  - Selective hunting on females; why: \_\_\_\_\_
  - Ban of hunting; why: \_\_\_\_\_
  - Increased biosecurity measures; why: \_\_\_\_\_
  - Ban of supplementary feeding; why: \_\_\_\_\_
  - Other; why: \_\_\_\_\_
- Please specify: \_\_\_\_\_
- \_\_\_\_\_
- None of the above, because all are feasible

**Question 9:**

What are the hindering factors in supporting the control and elimination of ASF in wild boar (multiple answers possible)?

- |                                                             |                                                             |
|-------------------------------------------------------------|-------------------------------------------------------------|
| <input type="checkbox"/> Time constraints                   | <input type="checkbox"/> I do not consider ASF as a problem |
| <input type="checkbox"/> Do not know how I could support it | <input type="checkbox"/> Additional costs                   |
| <input type="checkbox"/> Lack of trust in the authorities   | <input type="checkbox"/> I do not believe this is possible  |

**Part IV. Enhanced passive surveillance (active search and reporting of carcasses)**

**Question 10:**

|                                                                                                  | Very                     | To a high extent         | Neither nor              | To a low extent          | Not at all               |
|--------------------------------------------------------------------------------------------------|--------------------------|--------------------------|--------------------------|--------------------------|--------------------------|
| <b>Looking for carcasses, at times when you are out in the forest anyway (e.g. for hunting):</b> |                          |                          |                          |                          |                          |
| How do you assess the <b>effectiveness</b> ?                                                     | <input type="checkbox"/> | <input type="checkbox"/> | <input type="checkbox"/> | <input type="checkbox"/> | <input type="checkbox"/> |
| How <b>willing</b> are you to support this?                                                      | <input type="checkbox"/> | <input type="checkbox"/> | <input type="checkbox"/> | <input type="checkbox"/> | <input type="checkbox"/> |
| <b>Going actively out into the forest to focus specifically on the carcass search:</b>           |                          |                          |                          |                          |                          |
| How do you assess the <b>effectiveness</b> ?                                                     | <input type="checkbox"/> | <input type="checkbox"/> | <input type="checkbox"/> | <input type="checkbox"/> | <input type="checkbox"/> |
| How <b>willing</b> are you to support this <b>if you get paid</b> ?                              | <input type="checkbox"/> | <input type="checkbox"/> | <input type="checkbox"/> | <input type="checkbox"/> | <input type="checkbox"/> |
| How <b>willing</b> are you to support this <b>without any financial compensation</b> ?           | <input type="checkbox"/> | <input type="checkbox"/> | <input type="checkbox"/> | <input type="checkbox"/> | <input type="checkbox"/> |

**Question 11:**

| What are the hindering reasons to support carcass search and reporting (multiple answers possible)? |                                                                                           |
|-----------------------------------------------------------------------------------------------------|-------------------------------------------------------------------------------------------|
| <input type="checkbox"/> Time constraints                                                           | <input type="checkbox"/> Difficulties to find dead wild boar                              |
| <input type="checkbox"/> Lack of personal benefit                                                   | <input type="checkbox"/> I do not believe that carcass finding will help to eliminate ASF |
| <input type="checkbox"/> Additional costs                                                           | <input type="checkbox"/> I do not believe control and elimination is possible             |
| <input type="checkbox"/> Requirement to bury the carcasses by hunters                               | <input type="checkbox"/> Other, please specify: _____                                     |

**Question 12:**

| What options would increase your motivation to support passive surveillance (multiple answers possible)?      |
|---------------------------------------------------------------------------------------------------------------|
| <input type="checkbox"/> Personal financial support                                                           |
| <input type="checkbox"/> Personal support from additional forces (reduction of work)                          |
| <input type="checkbox"/> Availability of trained dogs for carcass finding                                     |
| <input type="checkbox"/> Detailed feedback from the authorities regarding the disease status of the wild boar |
| <input type="checkbox"/> No further work than reporting the location of the dead wild boar                    |
| <input type="checkbox"/> Other, please specify: _____                                                         |

**Comments:**

Is there anything else you would like to tell us?

---



---



---

**Thank you for your participation! Your time is greatly appreciated and has contributed to our research.**
